# Supplementary material for: Study of Melamine-Formaldehyde/Phase Change Material Microcapsules for the Preparation of Polymer Films by Extrusion
Source: MDPI journal article supplement (doi:10.3390/membranes12030266), 2022-02-25
Supplement: s1 [file s1]

Supplementary materials

# Study of Melamine-Formaldehyde/Phase Change Material Microcapsules for the Preparation of Polymer Films by Extrusion

Sara García-Viñuales <sup>1,2</sup>, César Rubio <sup>1,2</sup>, Lidia Martínez-Izquierdo <sup>1,2</sup>, Beatriz Zornoza <sup>1,2,\*</sup>, Elena Piera <sup>3</sup>, Miguel Ángel Caballero <sup>3</sup> and Carlos Téllez <sup>1,2,\*</sup>

<sup>1</sup> Instituto de Nanociencia y Materiales de Aragón (INMA), CSIC-Universidad de Zaragoza, 50009 Zaragoza, Spain; sgarvi@unizar.es (S.G.-V.); cesar.rubio@unizar.es (C.R.); limartinez@unizar.es (L.M.-I.)

<sup>2</sup> Chemical and Environmental Engineering Department, Universidad de Zaragoza, 50018 Zaragoza, Spain

<sup>3</sup> Research and Development Department, Nurel S.A., Ctra. Barcelona km 329, 50016 Zaragoza, Spain; epiera@samca.com (E.P.); acaballero@samca.com (M.A.C.)

\* Correspondence: bzornoza@unizar.es (B.Z.); ctellez@unizar.es (C.T.)

**Abstract:** n-Eicosane-melamine formaldehyde microcapsules of an average size of 1.1  $\mu\text{m}$  and latent heat of fusion of  $146.2 \pm 5.3$  J/g have been prepared. They have been characterized by scanning electron microscopy, FTIR spectroscopy, calorimetric techniques, and thermogravimetric analyses. Under processing conditions, the microcapsules apparently preserved their properties, also maintaining their n-eicosane loading and heat storage capacity under washing conditions (water with detergent at 60  $^{\circ}\text{C}$ ). The microcapsules synthesis has been scaled up for the fabrication of functional films by extrusion. For that, polymer films containing 10 wt.% of microcapsules were prepared at a pilot plant level. In those films, even though a fraction of the n-eicosane loading was lost during the extrusion process, the microcapsules showed good compatibility within the polyamide. The percentage of PCM in the polyamide 6 films was estimated by TGA, verifying also the heat storage capacity predicted by DSC ( $2.6 \pm 0.7$  J/g).

**Keywords:** n-Eicosane-melamine formaldehyde microcapsules; polyamide 6 films; phase change material; Heat storage

**Citation:** García-Viñuales, S.; Rubio, C.; Martínez-Izquierdo, L.; Zornoza, B.; Piera, E.; Caballero, M.Á.; Téllez, C. Study of Melamine-Formaldehyde/Phase Change Material Microcapsules for the Preparation of Polymer Films by Extrusion. *Membranes* **2022**, *12*, 266. <https://doi.org/10.3390/membranes12030266>

Academic Editors: Claudia Ursino and Takeshi Matsuura

Received: 24 December 2021

Accepted: 23 February 2022

Published: 25 February 2022

**Publisher's Note:** MDPI stays neutral with regard to jurisdictional claims in published maps and institutional affiliations.

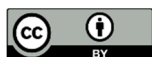

**Copyright:** © 2022 by the authors. Licensee MDPI, Basel, Switzerland. This article is an open access article distributed under the terms and conditions of the Creative Commons Attribution (CC BY) license (<https://creativecommons.org/licenses/by/4.0/>).

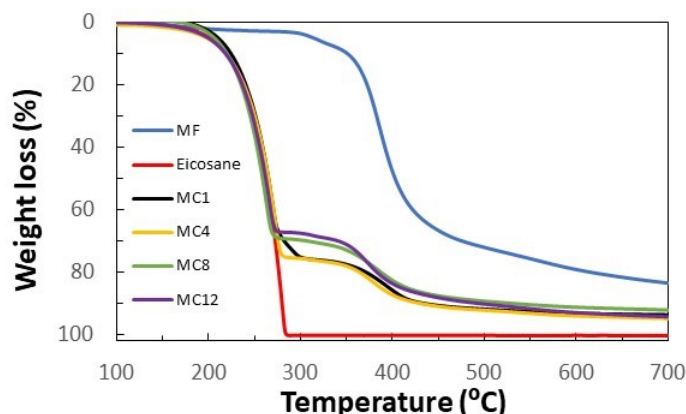

**Figure S1.** TGA of the MF/n-eicosane MCs synthesized during the scaling process.

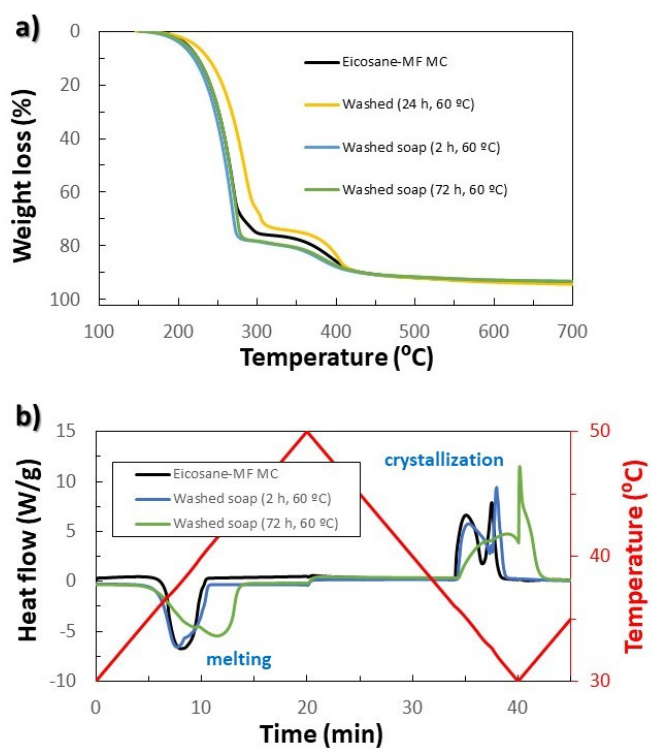

**Figure S2.** Microcapsules MC1 washed in different conditions: (a) TGA; (b) DSC.

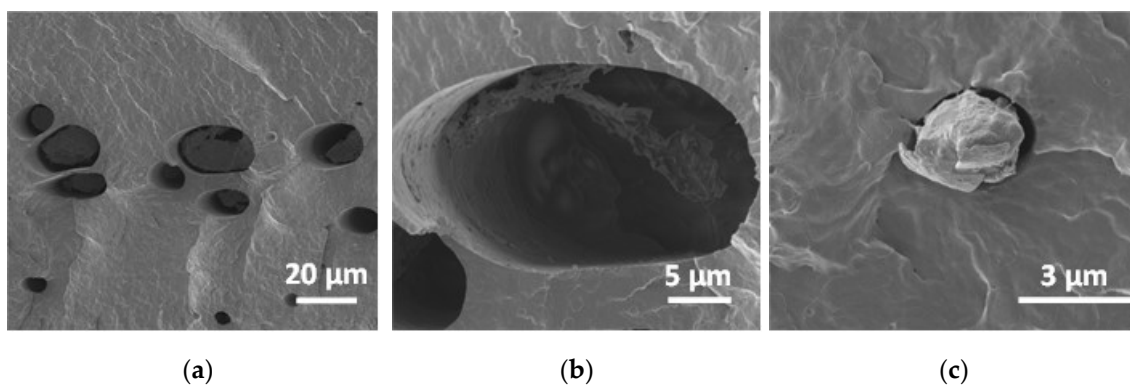

**Figure S3.** Cross-section view of PA6 film made at 235 °C and 90 bar with 17 wt.% MF/n-eicosane MCs.

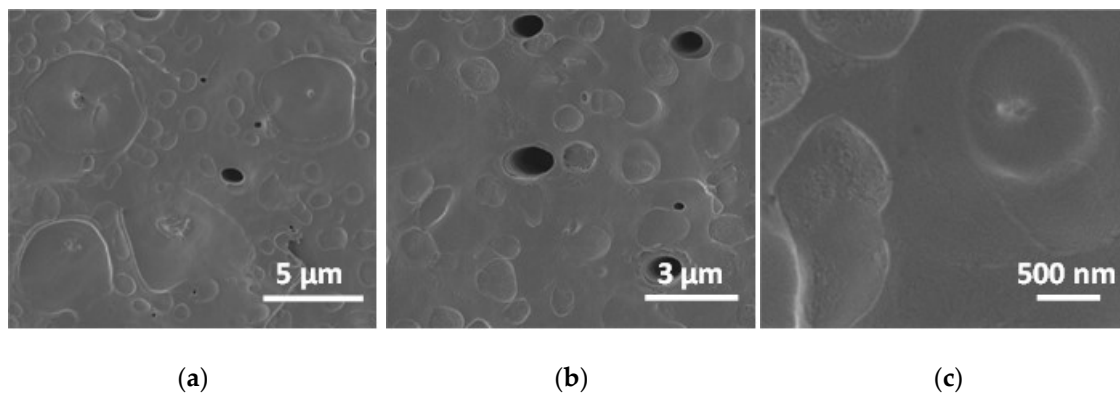

**Figure S4.** Cross-section view of PA6 film made at 235 °C and 90 bar with 9 wt.% MF/n-eicosane MCs.

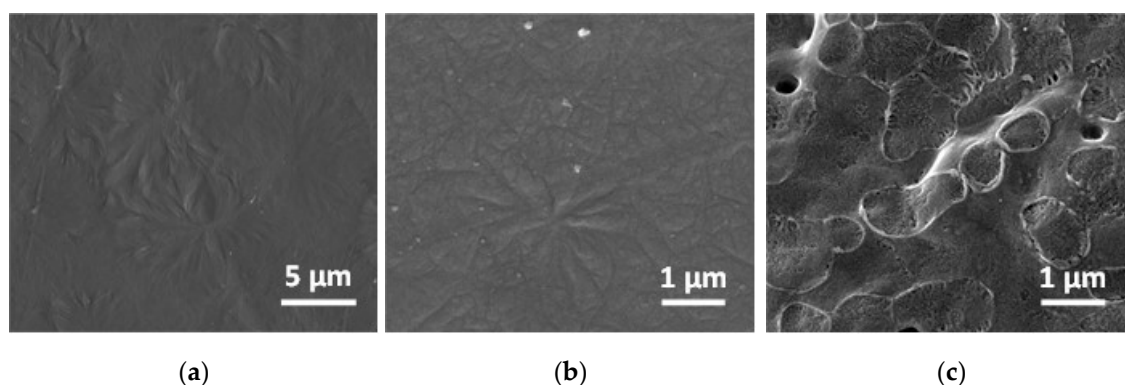

**Figure S5.** PA6 film made at 256 °C and 50 bar: (a) surface view without MCs; (b) surface view with 10 wt.% eicosane-MF MCs and (c) cross section view with 10 wt.% MF/n-eicosane MCs.

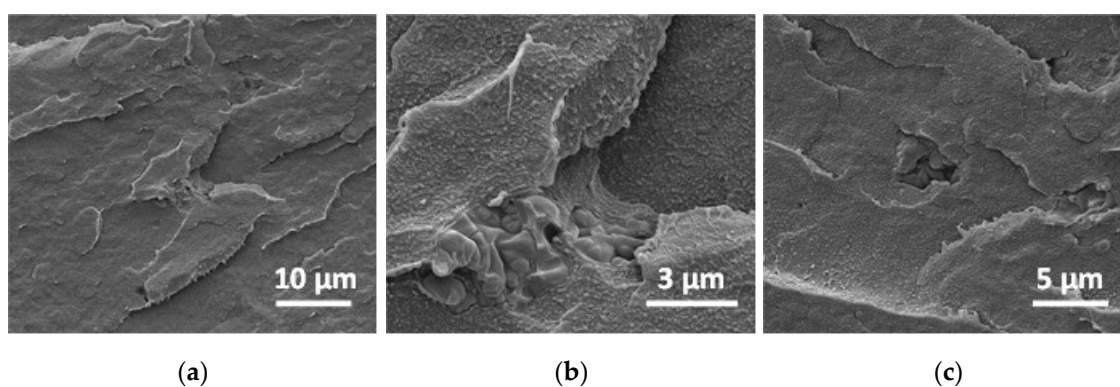

**Figure S6.** Cross-section view of low density polyethylene film made at 133 °C and 181 bar with 10 wt.% MF/n-eicosane MCs.
